# Supplementary material for: Applications and Recruitment Performance of Web-Based Respondent-Driven Sampling: Scoping Review
Source: PubMed Central journal article supplement (PMC7846441; doi:10.2196/17564), 2021-01-15
Supplement: jmir_v23i1e17564_app1.pdf [file jmir_v23i1e17564_app1.pdf]

## **Multimedia Appendix 1.** Search syntaxes

**Pubmed:** (implement\* OR develop\* OR test\* OR adopt\* OR pilot\*) AND (online OR "web based" OR "web-based" OR internet OR "internet based" OR "internet-based") AND ("respondent driven" OR "respondent-driven" OR "peer driven" OR "peer-driven" OR "participant driven" OR "participant-driven" OR snowball OR "chain-referral" OR "chain-referral") AND (intervention OR sampling OR recruitment OR referral)

**Scopus:** TITLE-ABS-KEY ((implement\* OR develop\* OR test\* OR adopt\* OR pilot\*) AND (online OR "web based" OR "web-based" OR internet OR "internet based" OR "internet-based") AND ("respondent driven" OR "respondent-driven" OR "peer driven" OR "peer-driven" OR "participant driven" OR "participant-driven" OR snowball OR "chain-referral" OR "chain-referral") AND (intervention OR sampling OR recruitment OR referral))

**Web of Science:** TS=((implement\* OR develop\* OR test\* OR adopt\* OR pilot\*) AND (online OR "web based" OR "web-based" OR internet OR "internet based" OR "internet-based") AND ("respondent driven" OR "respondent-driven" OR "peer driven" OR "peer-driven" OR "participant driven" OR "participant-driven" OR snowball OR "chain-referral" OR "chain-referral") AND (intervention OR sampling OR recruitment OR referral))
