# Supplementary material for: Applications and Recruitment Performance of Web-Based Respondent-Driven Sampling: Scoping Review
Source: PubMed Central journal article supplement (PMC7846441; doi:10.2196/17564), 2021-01-15
Supplement: jmir_v23i1e17564_app2.pdf [file jmir_v23i1e17564_app2.pdf]

## Multimedia Appendix 2. Recruitment results

| Reference                | Seed recruitment and selection |                                     |                        | Peer-recruitment        |                      |                                |                                                                                   | Recruitment performance    |                              |                                    |                                               |                   |                                              |                                          |
|--------------------------|--------------------------------|-------------------------------------|------------------------|-------------------------|----------------------|--------------------------------|-----------------------------------------------------------------------------------|----------------------------|------------------------------|------------------------------------|-----------------------------------------------|-------------------|----------------------------------------------|------------------------------------------|
|                          | Seed recruitment platform      | Seed selection                      | Nr. of seeds recruited | Type                    | Incentives Structure | Max. value incentive           | Recruitment options                                                               | Max nr. of coupons allowed | Reminder sent Yes/No (freq.) | % of seeds successfully recruiting | % of all participants successfully recruiting | Max. nr. of waves | Final sample size (corrected <sup>b)</sup> ) | Equilibrium (after N <sup>th</sup> wave) |
| Jonsson et al., 2019     | On/offline                     | Phone call                          | 57                     | Material                | Double               | \$20                           | Email, Sharing web-link through preferred means of communication)                 | 4                          | Yes                          | 59.6 <sup>a</sup>                  | 49.6 <sup>a</sup>                             | 15                | 595 (551)                                    | Yes (n/s)                                |
| Weinmann et al., 2019    | On/offline                     | n/s                                 | 16                     | Material                | Double               | \$22 (E 20)                    | n/s                                                                               | 3                          | n/s                          | n/s                                | n/s                                           | n/s               | 195 (n/s)                                    | Yes (1)                                  |
| Oesterle et al., 2018    | Online                         | Online form and email or phone call | 185                    | Material + non-material | Double               | No limit                       | n/s                                                                               | No limit                   | n/s                          | 7.5                                | n/s                                           | n/s               | 235 (n/s)                                    | n/s                                      |
| Tran et al., 2018        | n/s                            | Online form                         | 30                     | Material                | Single               | No limit                       | Sharing web-link through preferred means of communication                         | No limit                   | n/s                          | n/s                                | n/s                                           | n/s               | 366 (356)                                    | No                                       |
| Sadasivam et al, 2017    | Online                         | Online form                         | 190                    | Material + non-material | Double               | \$115                          | Sharing web-link through preferred means of communication                         | No limit                   | Yes                          | 24.7                               | 15                                            | 4                 | 759 (n/s)                                    | n/s                                      |
| Bourke et al., 2016      | n/s                            | n/s                                 | 12                     | Material                | Double               | iPad (lottery-based)           | Email                                                                             | 3                          | Yes                          | 33                                 | 21                                            | 1                 | 19 (19)                                      | No                                       |
| Hildebrand et al., 2015  | On/offline(flyer)              | n/s                                 | 68                     | Material                | Double               | \$32 (AU\$45)                  | Sharing web-link through preferred means of communication                         | 3                          | Yes                          | n/s                                | n/s                                           | 12                | 780 (n/s)                                    | n/s                                      |
| Stein, M L et al, 2015   | Online                         | Online form                         | 1015                   | Material + non-material | Single               | \$28 (E25, lottery based)      | Email, private Facebook messages                                                  | 4                          | Yes                          | 19.1                               | 22.7                                          | 6                 | 1448 (1429)                                  | n/s                                      |
| Stromdahl et al., 2015   | On/offline                     | n/s                                 | 37                     | Material                | Double               | \$20                           | Email, sharing web-link through preferred means of communication                  | 4                          | n/s                          | n/s                                | 35.1 <sup>a</sup>                             | 9                 | 148 (130)                                    | No                                       |
| Theunissen et al., 2015  | Offline                        | In-person                           | 30                     | Non-material            | Single               | None                           | Email                                                                             | No limit                   | Yes                          | 20 <sup>a</sup>                    | 9.2 <sup>a</sup>                              | 2                 | 68 (68)                                      | n/s                                      |
| Bengtsson et al., (2014) | On/offline                     | n/s                                 | 13                     | Material + non-material | Double               | \$12.45 + iPad (lottery based) | Email, Yahoo Messenger, sharing web-link through preferred means of communication | 4                          | Yes                          | 76.9 <sup>a</sup>                  | 42.5 <sup>a</sup>                             | 29                | 982 (870)                                    | Yes (11)                                 |
| Crawford, 2014           | Offline                        | n/s                                 | 1                      | Non-material            | Single               | None                           | Sharing web-link through preferred means of communication                         | 5                          | n/s                          | 100                                | 38.9 <sup>a</sup>                             | 5                 | 72 (n/s)                                     | No                                       |

|                            |            |                                        |    |                         |        |                                |                                                                                   |    |     |                   |                   |     |            |         |
|----------------------------|------------|----------------------------------------|----|-------------------------|--------|--------------------------------|-----------------------------------------------------------------------------------|----|-----|-------------------|-------------------|-----|------------|---------|
| Stein et al., 2014a        | On/offline | In-group meetings and invitation email | 92 | Non-material            | Single | None                           | Email, private Facebook message                                                   | 4  | n/s | 72.8 <sup>a</sup> | 38.8 <sup>a</sup> | 5   | 358 (n/s)  | n/s     |
| Stein et al., 2014b        | On/offline | In-group meetings and invitation email | 89 | Non-material            | Single | None                           | Email, private Facebook message                                                   | 4  | Yes | 49.4 <sup>a</sup> | 33.9 <sup>a</sup> | 6   | 257 (245)  | No      |
| Bauermeister et al., 2012  | Online     | Online form and Phone call             | 22 | Material                | Double | \$70                           | Email, sharing web-link through preferred means of communication                  | 10 | n/s | n/s               | n/s               | n/s | 3448 (n/s) | n/s     |
| Bengtsson et al., 2012     | On/offline | n/s                                    | 20 | Material + non-material | Double | \$12.45 + iPad (lottery based) | Email, Yahoo Messenger, sharing web-link through preferred means of communication | 4  | Yes | 90 <sup>a</sup>   | 44.5 <sup>a</sup> | 24  | 676 (591)  | Yes (7) |
| Wejnert, 2009              | n/s        | n/s                                    | 9  | Material                | Double | \$25                           | Email                                                                             | 3  | n/s | 77.8 <sup>a</sup> | 51 <sup>a</sup>   | 23  | 378 (n/s)  | Yes (9) |
| Wejnert & Heckathorn, 2008 | n/s        | n/s                                    | 9  | Material                | Double | \$55                           | Email                                                                             | 3  | n/s | 67.4 <sup>a</sup> | 55 <sup>a</sup>   | 18  | 159 (n/s)  | Yes (9) |

Abbreviation: n/s, not specified

<sup>a</sup> Counted from reported recruitment tree

<sup>b</sup> Corrected for cheating/duplicate entries if reported
